# Supplementary material for: The Role of miRNAs to Detect Progression, Stratify, and Predict Relevant Clinical Outcomes in Bladder Cancer
Source: MDPI journal article supplement (doi:10.3390/ijms25042178), 2024-02-11
Supplement: s1 [file s1]

**Supplementary Table S1.** Tumor, Node, Metastasis Classification (TNM) Classification of BC.

| 2004 WHO/ISUP                                                     | Pathways | TNM classification                                                                                                      |     |                                                                                                                              |  |
|-------------------------------------------------------------------|----------|-------------------------------------------------------------------------------------------------------------------------|-----|------------------------------------------------------------------------------------------------------------------------------|--|
| Primary tumor (T)                                                 |          |                                                                                                                         |     |                                                                                                                              |  |
|                                                                   |          | Tx                                                                                                                      |     | Primary tumors cannot be assessed                                                                                            |  |
|                                                                   |          | T0                                                                                                                      |     | No evidence of a primary tumor                                                                                               |  |
| Papillary urothelial neoplasm of low malignant potential (PUNLMP) | NMIBC    | Tis                                                                                                                     |     | Carcinoma in situ is a flat, poorly differentiated tumor confined to mucosa                                                  |  |
| Low grade                                                         |          | Ta                                                                                                                      |     | Non-invasive papillary carcinoma, confined to the mucosa                                                                     |  |
|                                                                   |          | T1                                                                                                                      |     | Tumor invades subepithelial connective tissue (lamina propria)                                                               |  |
| High grade                                                        | MIBC     | T2<br>Tumor invades muscle                                                                                              | T2a | Tumor invades superficial muscularis propria (inner half)                                                                    |  |
|                                                                   |          |                                                                                                                         | T2b | Tumor invades deep muscularis propria (outer half)                                                                           |  |
|                                                                   |          | T3<br>Tumor invades perivesical tissue                                                                                  | T3a | Tumor invades perivesical fat microscopically                                                                                |  |
|                                                                   |          |                                                                                                                         | T3b | Tumor invades perivesical fat macroscopically                                                                                |  |
|                                                                   |          | T4<br>Tumor invades any of the following: prostate stroma, seminal vesicles, uterus, vagina pelvic wall, abdominal wall | T4a | Tumor invades prostate stroma, seminal vesicles, uterus, or vagina                                                           |  |
|                                                                   |          |                                                                                                                         | T4b | Tumor invades pelvic wall or abdominal wall                                                                                  |  |
| Regional lymph nodes (N)                                          |          |                                                                                                                         |     |                                                                                                                              |  |
|                                                                   |          | NX                                                                                                                      |     | Lymph nodes cannot be assessed                                                                                               |  |
|                                                                   |          | N0                                                                                                                      |     | No lymph node metastasis                                                                                                     |  |
|                                                                   |          | N1                                                                                                                      |     | Single regional lymph node metastasis in the true pelvis (hypogastric, obturator, external iliac or presacral lymph node)    |  |
|                                                                   |          | N2                                                                                                                      |     | Multiple regional lymph node metastasis in the true pelvis (hypogastric, obturator, external iliac, or presacral lymph node) |  |
|                                                                   |          | N3                                                                                                                      |     | Metastasis in common iliac lymph node(s)                                                                                     |  |
| Distant metastasis (M)                                            |          |                                                                                                                         |     |                                                                                                                              |  |
|                                                                   |          | M0                                                                                                                      |     | No distant metastasis                                                                                                        |  |
|                                                                   |          | M1                                                                                                                      |     | Distant metastasis                                                                                                           |  |
